# Supplementary material for: Research on Temporal and Spatial Resolution and the Driving Forces of Ecological Environment Quality in Coal Mining Areas Considering Topographic Correction
Source: MDPI journal article supplement (doi:10.3390/rs13142815), 2021-07-17
Supplement: s1 [file s1]

# Supplementary Materials: Research on temporal and spatial resolution and driving forces 2 of ecological environment quality in coal mining areas considering topographic correction *Remote Sensing* 2021, x, Article No.

Xinran Nie, Zhenqi Hu, Qi Zhu and Mengying Ruan

**Table S1.** Landsat remote sensing image used in this study.

| Data       | Sensor | Path/row | Azimuth angle | Elevation angle | Data       | Sensor   | Path/row | Azimuth angle | Elevation angle |
|------------|--------|----------|---------------|-----------------|------------|----------|----------|---------------|-----------------|
| 1987-09-17 | TM     | 124/34   | 137.51°       | 46.87°          | 2007-08-14 | TM       | 125/34   | 131.56°       | 59.01°          |
| 1987-09-24 | TM     | 125/34   | 140.36°       | 44.88°          | 2007-09-15 | TM       | 125/34   | 145.34°       | 50.60°          |
| 1988-09-26 | TM     | 125/34   | 142.44°       | 44.48°          | 2008-09-01 | TM       | 125/34   | 136.96°       | 53.36°          |
| 1989-09-13 | TM     | 125/34   | 135.64°       | 47.62°          | 2009-08-27 | ETM      | 125/34   | 136.34°       | 55.38°          |
| 1990-09-16 | TM     | 125/34   | 134.95°       | 46.01°          | 2010-09-23 | TM       | 125/34   | 147.42°       | 47.70°          |
| 1991-08-02 | TM     | 125/34   | 116.82°       | 56.30°          | 2011-08-09 | TM       | 125/34   | 127.79°       | 59.32°          |
| 1991-08-18 | TM     | 125/34   | 123.26°       | 53.48°          | 2011-09-19 | TM       | 124/34   | 145.30°       | 48.84°          |
| 1991-09-19 | TM     | 125/34   | 137.33°       | 45.83°          | 2012-09-04 | ETM      | 125/34   | 141.92°       | 53.87°          |
| 1992-09-05 | TM     | 125/34   | 131.14°       | 49.06°          | 2013-08-06 | ETM      | 125/34   | 129.09°       | 60.80°          |
| 1992-09-30 | TM     | 124/34   | 141.18°       | 42.16°          | 2013-08-15 | ETM      | 124/34   | 132.98°       | 58.97°          |
| 1993-09-24 | TM     | 125/34   | 139.07°       | 44.08°          | 2013-08-31 | ETM      | 124/34   | 140.14°       | 55.06°          |
| 1994-09-27 | TM     | 125/34   | 138.28°       | 42.46°          | 2013-09-07 | ETM      | 125/34   | 143.19°       | 53.11°          |
| 1996-09-16 | TM     | 125/34   | 134.74°       | 45.70°          | 2014-08-10 | OLI/TRIS | 124/34   | 132.53°       | 60.77°          |
| 1997-09-03 | TM     | 125/34   | 133.37°       | 51.15°          | 2014-09-18 | OLI/TRIS | 125/34   | 149.02°       | 50.51°          |
| 1998-09-06 | TM     | 125/34   | 136.69°       | 51.33°          | 2015-08-04 | OLI/TRIS | 125/34   | 129.86°       | 61.97°          |
| 1999-08-17 | TM     | 124/34   | 127.18°       | 55.88°          | 2015-09-14 | OLI/TRIS | 124/34   | 147.43°       | 51.65°          |
| 1999-08-24 | TM     | 125/34   | 130.25°       | 54.34°          | 2016-09-07 | OLI/TRIS | 125/34   | 145.01°       | 53.57°          |
| 2001-08-21 | ETM+   | 125/34   | 133.07°       | 56.63°          | 2017-08-10 | ETM      | 124/34   | 133.64°       | 61.08°          |
| 2001-09-06 | ETM+   | 125/34   | 140.14°       | 52.53°          | 2017-09-18 | ETM      | 125/34   | 150.07°       | 50.49°          |
| 2002-09-01 | TM     | 125/34   | 132.93°       | 51.92°          | 2018-08-28 | OLI/TRIS | 125/34   | 140.25°       | 56.43°          |
| 2004-09-22 | TM     | 125/34   | 145.25°       | 47.23°          | 2018-09-29 | OLI/TRIS | 125/34   | 152.83°       | 46.72°          |
| 2005-09-17 | ETM    | 125/34   | 144.79°       | 49.33°          | 2019-08-15 | OLI      | 125/34   | 134.64°       | 59.75°          |
| 2006-09-05 | TM     | 124/34   | 141.48°       | 53.52°          | 2019-09-25 | OLI      | 124/34   | 151.63°       | 48.18°          |
| 2006-09-12 | TM     | 125/34   | 144.45°       | 51.51°          | 2020-09-18 | OLI      | 125/34   | 149.37°       | 50.18°          |

**Table S2.** Land cover area of the study area (km<sup>2</sup>).

| Year | Water | Vegetation | Construction land | Bare land |
|------|-------|------------|-------------------|-----------|
| 1987 | 27.31 | 1414.13    | 124.69            | 171.32    |
| 1998 | 17.26 | 1432.2     | 139.36            | 148.63    |
| 2010 | 20.35 | 1492       | 219.43            | 5.67      |
| 2020 | 18.29 | 1447.88    | 249.38            | 21.9      |

**Table S3.** Classification accuracy of land cover data.

| Year | Overall accuracy (%) | Kappa coefficient |
|------|----------------------|-------------------|
| 1987 | 94.02                | 0.88              |
| 1998 | 97.13                | 0.94              |
| 2010 | 97.69                | 0.91              |
| 2020 | 97.54                | 0.91              |

**Table S4.** Percentage change of ecological environment quality level within the boundaries of mineral rights from 1987 to 2020.

| Type      | Level | 1987–1998         |               | 1998–2010         |               | 2010–2020         |               | 1987–2020         |               |
|-----------|-------|-------------------|---------------|-------------------|---------------|-------------------|---------------|-------------------|---------------|
|           |       | Level percent (%) | Sub-total (%) |
| Improved  | 4     | 0.09              |               | 0.06              |               | 0.09              |               | 0.94              |               |
|           | 3     | 1.90              |               | 1.65              |               | 0.54              |               | 9.80              |               |
|           | 2     | 23.09             | 74.24         | 20.17             | 74.01         | 3.55              | 41.44         | 30.94             | 76.11         |
|           | 1     | 49.16             |               | 52.13             |               | 37.26             |               | 34.43             |               |
| Unchanged | 0     | 0.62              | 0.62          | 0.51              | 0.51          | 0.71              | 0.71          | 0.31              | 0.31          |
| Degraded  | -1    | 21.44             |               | 20.57             |               | 47.54             |               | 17.41             |               |
|           | -2    | 3.35              |               | 3.21              |               | 7.84              |               | 5.00              |               |
|           | -3    | 0.31              | 25.13         | 1.42              | 25.48         | 2.07              | 57.85         | 1.05              | 23.58         |
|           | -4    | 0.03              |               | 0.28              |               | 0.40              |               | 0.11              |               |

**Table S5.** The mean value and standard deviation (SD) of each ecological environment index before and after SCS + C correction.

| Sensor   | Correction Model | Statistics | NDVI   | Wet     | NDBSI   | LST     | RSEI   |
|----------|------------------|------------|--------|---------|---------|---------|--------|
| TM       | Original image   | Mean       | 0.5253 | -0.0906 | -0.1765 | 24.5585 | 0.6558 |
|          |                  | SD         | 0.1630 | 0.0325  | 0.0881  | 1.9361  | 0.2357 |
|          | SCS + C          | Mean       | 0.5247 | -0.0902 | -0.1758 | 24.5221 | 0.6715 |
|          |                  | SD         | 0.1625 | 0.0303  | 0.0863  | 1.7426  | 0.2326 |
| ETM+     | Original image   | Mean       | 0.6137 | -0.1014 | -0.1111 | 22.5444 | 0.6391 |
|          |                  | SD         | 0.1957 | 0.0261  | 0.1051  | 2.7139  | 0.2510 |
|          | SCS + C          | Mean       | 0.6129 | -0.1010 | -0.1104 | 22.5125 | 0.6486 |
|          |                  | SD         | 0.1949 | 0.0246  | 0.1041  | 2.5803  | 0.2507 |
| OLI/TIRS | Original image   | Mean       | 0.5940 | -0.0073 | -0.2229 | 24.8868 | 0.6496 |
|          |                  | SD         | 0.1982 | 0.0233  | 0.1057  | 2.0667  | 0.2548 |
|          | SCS + C          | Mean       | 0.5929 | -0.0071 | -0.2218 | 24.8569 | 0.6600 |
|          |                  | SD         | 0.1973 | 0.0228  | 0.1040  | 1.9373  | 0.2538 |

**Table S6.** The contribution and load of the four variables to the first principal component (PC1) before and after SCS + C correction.

| PC Analysis            | Original image |          |              | Image corrected by SCS + C |          |              |
|------------------------|----------------|----------|--------------|----------------------------|----------|--------------|
|                        | TM PC1         | ETM+ PC1 | OLI/TIRS PC1 | TM PC1                     | ETM+ PC1 | OLI/TIRS PC1 |
| NDVI                   | 0.5619         | -0.5958  | 0.5833       | 0.5807                     | 0.6012   | 0.5947       |
| Wet                    | 0.4136         | -0.3262  | 0.4248       | 0.4075                     | 0.3118   | 0.4050       |
| NDBSI                  | -0.5611        | 0.5681   | -0.5576      | -0.5667                    | -0.5734  | -0.5622      |
| LST                    | -0.4453        | 0.4646   | -0.4104      | -0.4189                    | -0.4611  | -0.4077      |
| Eigenvalue             | 0.1576         | 0.1742   | 0.1886       | 0.1536                     | 0.1723   | 0.1825       |
| Percent eigenvalue (%) | 78.87          | 80.18    | 82.61        | 79.56                      | 80.73    | 83.01        |

**Table S7.** Pearson correlation coefficient between climate variables and the mean of RSEI. \* Indicates that the correlation is significant at the 0.05 level.

| Study area         | Average annual temperature | Average temperature in August and September | Annual precipitation | Precipitation in August and September |
|--------------------|----------------------------|---------------------------------------------|----------------------|---------------------------------------|
| Yangquan Coal Mine | 0.127                      | -0.271                                      | 0.361*               | 0.380*                                |
| M1                 | 0.320                      | 0.075                                       | 0.173                | 0.099                                 |
| M2                 | 0.255                      | 0.009                                       | 0.215                | 0.177                                 |
| M3                 | 0.280                      | 0.020                                       | 0.228                | 0.182                                 |
| M4                 | 0.279                      | 0.173                                       | 0.176                | 0.194                                 |
| M5                 | 0.223                      | -0.063                                      | 0.177                | 0.130                                 |
| M6                 | 0.273                      | -0.044                                      | 0.207                | 0.164                                 |
| D1                 | 0.128                      | 0.174                                       | 0.277                | -0.143                                |
| D2                 | -0.221                     | -0.178                                      | 0.014                | 0.207                                 |
| D3                 | -0.112                     | -0.026                                      | -0.125               | 0.115                                 |
| D4                 | -0.069                     | -0.115                                      | 0.132                | 0.352                                 |
| D5                 | -0.185                     | 0.108                                       | 0.031                | 0.135                                 |
| D6                 | -0.104                     | -0.364*                                     | 0.061                | 0.346                                 |

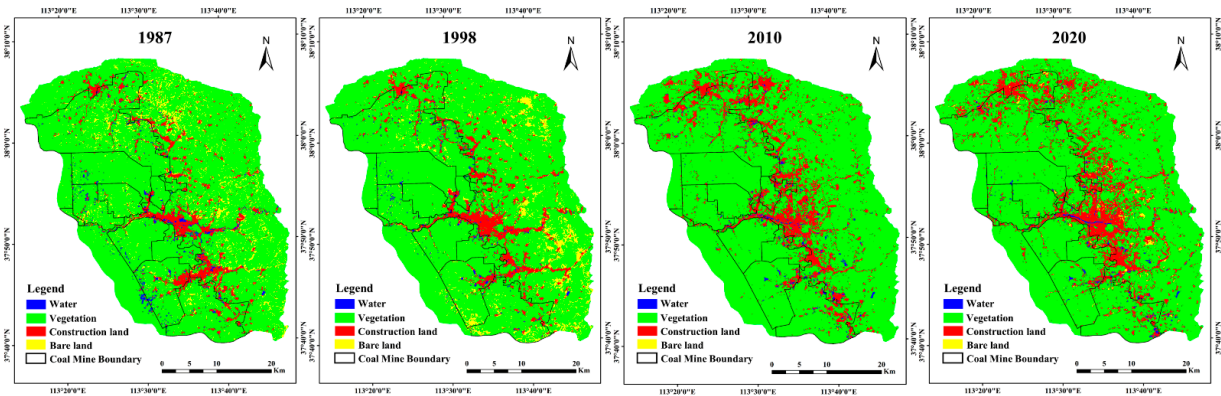

**Figure S1.** Land cover maps of the study area.

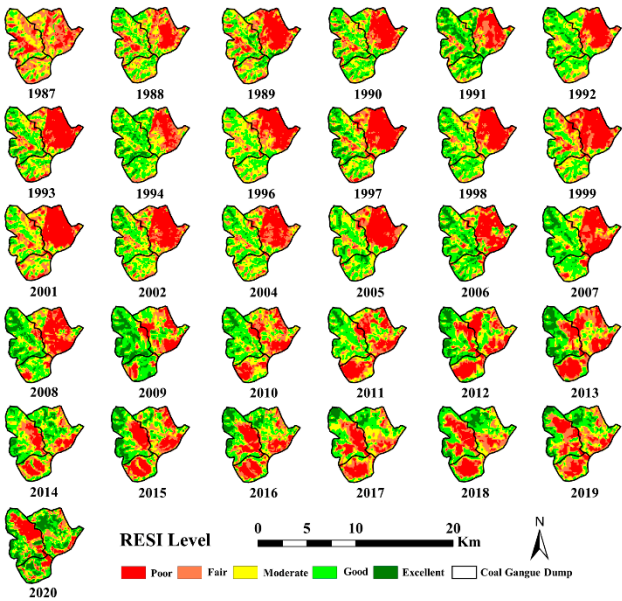

**Figure S2.** Spatial distribution of RSEI grades of D1, D2 and D3 coal gangue dumps from 1987 to 2020.

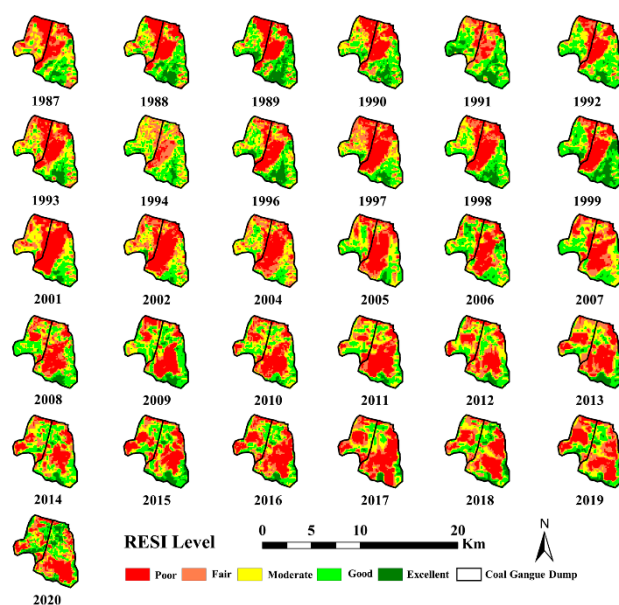

**Figure S3.** Spatial distribution of RSEI grades of D4 and D5 coal gangue dumps from 1987 to 2020.

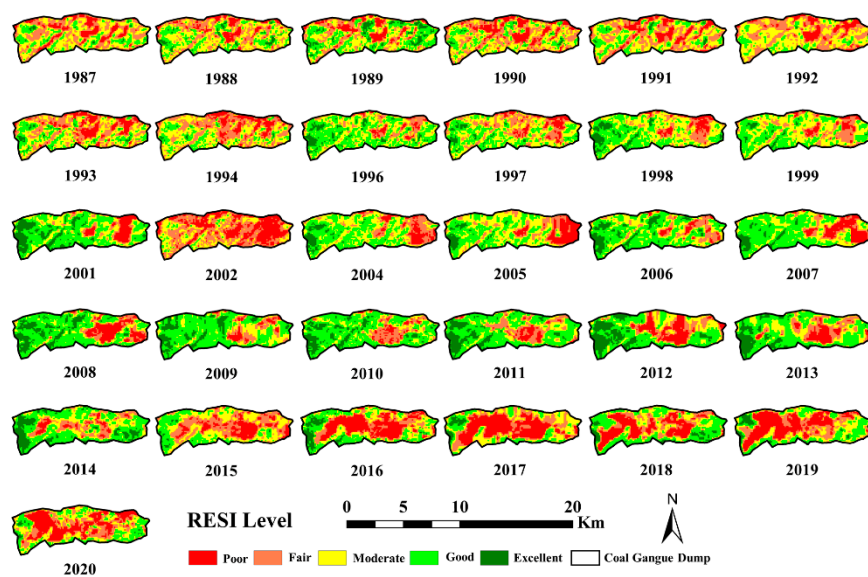

**Figure S4.** Land cover maps of the study area.

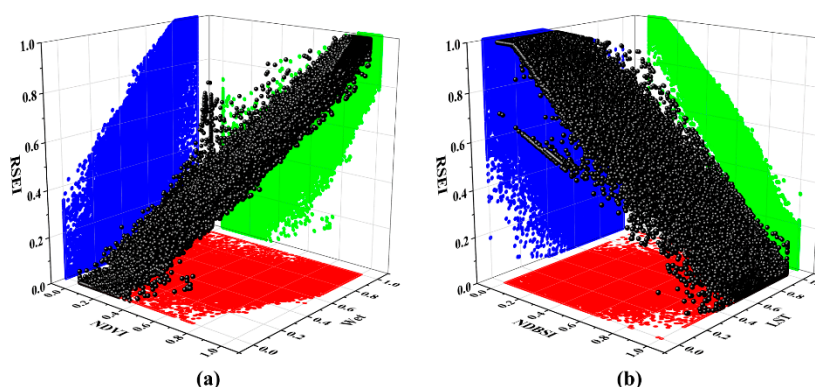

**Figure S5.** Three-dimensional scatter plots of NDVI, Wet, NDBSI, LST and RSEI. (a) Three-dimensional scatter plots of NDVI, Wet and RSEI, (b) Three-dimensional scatter plots of NDBSI, LST and RSEI. The top of the scatter plot represents an area with better ecological environment quality, where the vegetation coverage is higher, the surface humidity is higher, the density of buildings and bare soil is lower, and the surface temperature is lower. The bottom of the scatter plot represents areas with worse ecological environment quality, where vegetation coverage is lower, surface humidity is lower, the density of buildings and bare soil is higher, and the surface temperature is higher.

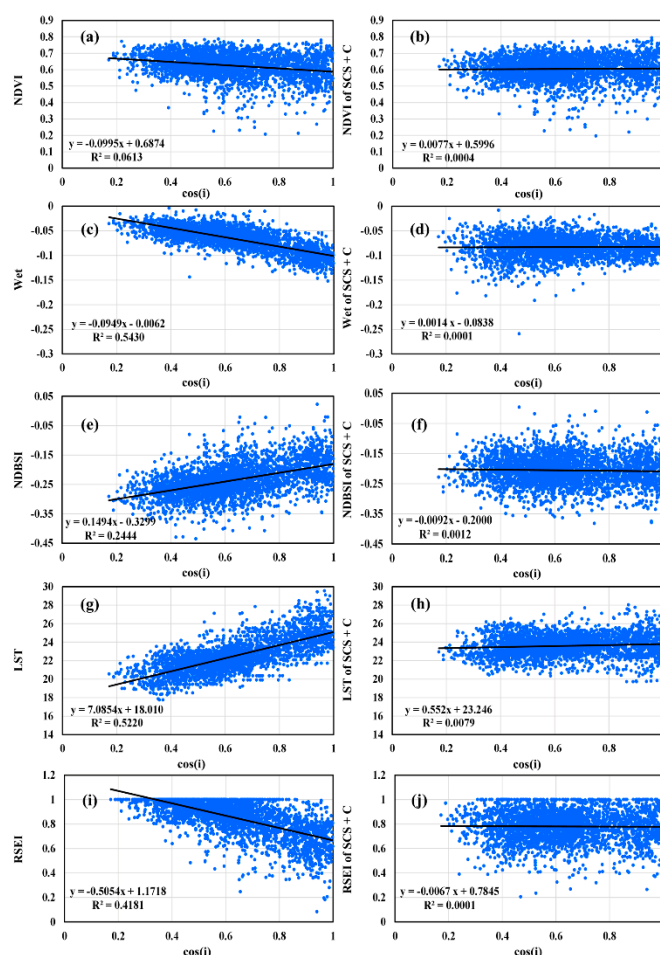

**Figure S6.** Scatter plots and fitted lines of ecological environment index values and  $\cos(i)$  before and after SCS + C correction. (a) scatter plot and fitting line of NDVI and  $\cos(i)$  before SCS + C correction, (b) scatter plot and fitting line of NDVI and  $\cos(i)$  after SCS + C correction, (c) scatter plot and fitting line of Wet and  $\cos(i)$  before SCS + C correction, (d) scatter plot and fitting line of Wet and  $\cos(i)$  after SCS + C correction, (e) scatter plot and fitting line of NDBSI and  $\cos(i)$  before SCS + C correction, (f) scatter plot and fitting line of NDBSI and  $\cos(i)$  after SCS + C correction, (g) scatter plot and fitting line

of LST and cosi before SCS + C correction, (h) scatter plot and fitting line of LST and cosi after SCS + C correction, (i) scatter plot and fitting line of RSEI and cosi before SCS + C correction, (j) scatter plot and fitting line of RSEI and cosi after SCS + C correction.

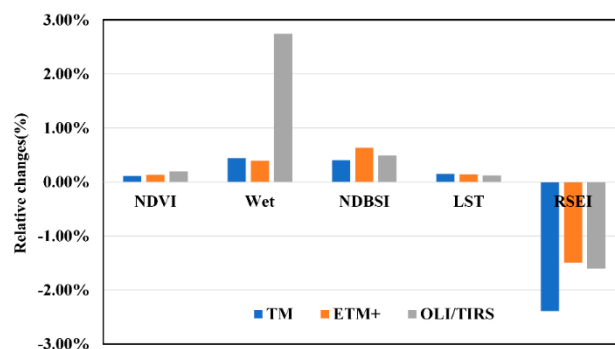

**Figure S7.** The relative change rate of the mean value of each ecological environment index before and after topographic correction.
